# Supplementary material for: First application of supported ionic liquid phase (SILP) catalysis for continuous methanol carbonylation
Source: Royal Society of Chemistry journal article supplement (doi:10.1039/b516314e), 2006-01-01
Supplement: b516314e.pdf [file b516314e.pdf]

## Supplementary Information

### First application of Supported Ionic Liquid Phase (SILP) catalysis for continuous methanol carbonylation

Anders Riisager,<sup>\*a</sup> Betina Jørgensen,<sup>a</sup> Peter Wasserscheid<sup>b</sup> and Rasmus Fehrmann<sup>a</sup>

#### Gas-phase methanol carbonylation with SILP [BMIM][Rh(CO)<sub>2</sub>I<sub>2</sub>]-[BMIM]I-SiO<sub>2</sub> catalyst

Continuous, gas-phase carbonylations of methanol with carbon monoxide gas and methyl iodide co-catalyst were performed in an all-heated stainless steel (AISI 316Ti) catalyst test system with the SILP catalyst positioned as a fixed-bed in a tubular reactor, placed in a temperature controlled aluminum block oven. The temperature inside the reactor was measured ( $\pm 0.1$  °C) by an internally positioned thermocouple (Inconel® 600, Omega) placed ca. 0.5 cm above the catalyst bed. The catalytic test system allowed the reactant feed composition of CO gas (99.97 %, Strandmoellen Lab) and liquid methanol-methyl iodide mixture (MeOH:  $\geq 99.9$  %, Aldrich, dried with 3 Å molecular sieves; MeI:  $\geq 99.5$  %, Fluka) to be carefully regulated *via* the flows (i.e.  $F_{\text{CO}}$  and  $F_{\text{liq}}$ ) using gas- and liquid mass-flow controllers (Hi-Tec, Bronkhorst), respectively, integrated with an evaporator and mixing unit (Hi-Tec CEM unit, Bronkhorst). Additionally, the reaction pressure was controlled by a regulation loop consisting of a pneumatic back-pressure regulator valve (Microvalve 3510, Samson), an electronic controller (Trovis 6493) and a pressure transducer (Wika S-11). Gas-phase products and unreacted reactants were analyzed periodically by an integrated on-line FID-GC (Perkin Elmer Autosystem XL, Nukol capillary column, 15 m  $\times$  0.53 mm ID, Supelco Inc.) using auto gas sampling. The FID-GC analysis allowed determination of methanol conversion and catalyst activity (as turn-over-frequency as mol product formed per mol rhodium per hour) and the product selectivity.
